# Supplementary material
Source: PubMed Central journal article supplement (PMC6706274)
Supplement: NIHMS1045279-supplement-1.pdf [file NIHMS1045279-supplement-1.pdf]

# 1 Supplemental Material

## 2 Materials & Methods: blood clot samples

3 After local institutional review board approval and informed written consent,  
4 venous whole blood was drawn from patients undergoing invasive catheterization  
5 procedures at the University of Chicago Medicine cardiac catheterization laboratory.  
6 Following an established protocol (Sutton *et al* 2013, Mercado-Shekhar *et al* 2018), in  
7 vitro clots were then produced in Pasteur pipettes (14.6 cm length, 2 mL capacity, Fisher  
8 Scientific, Hanover Park, IL, USA). Clots were approximately 4 mm in diameter. The  
9 clots were removed from the pipettes by gently flushing with isotonic saline (0.9% NaCl  
10 w/v), and suspended in the acrylic mold with nylon thread. An isotonic (0.9% NaCl w/v)  
11 low-gelling temperature liquid agarose mixture (2% w/v, product number A0701, Sigma-  
12 Aldrich, St. Louis, MO, USA) was cooled to 40°C and poured into the mold. The agarose  
13 was allowed to solidify, after which the agarose-embedded clot was stored at 4°C  
14 overnight. A total of 4,000 pulses with a peak negative pressure of 18 MPa were  
15 generated in three locations in each of three clots (nine total data sets). Passive  
16 cavitation and plane wave images were acquired during insonation as described in the  
17 main text. MR imaging parameters for diffusion imaging of clot samples are listed in  
18 Table S1. All other post-hoc MR and conventional B-mode images of insonated clot  
19 samples were acquired as described in the main text. Four-millimeter sections  
20 encompassing the liquefied regions were collected from each insonified region of the clot  
21 samples. These samples were processed and stained with H&E as described in the  
22 main text. Registration between imaging and histological clot samples was not possible  
23 due to movement of residual clot during fixing and processing. Minimal changes in tissue  
24 sample size and shape occurred due to histological processing. Background ROIs were

25 drawn for each sample in untargeted portions of clots, and the average PCI acoustic  
 26 power, plane wave and post hoc conventional B-mode grayscale,  $T_1$ ,  $T_2$ , and ADC  
 27 values within the liquefaction zones and background ROIs were computed. Differences  
 28 in these values were evaluated for significance as described in the main text.

29

30 **Table S1:** MR scan parameters used for parametric mapping of ADC in blood clot  
 31 samples.

| Sequence                                     | TR/TE (ms) | In-plane resolution (acquisition) (mm <sup>2</sup> ) | Array size (recon matrix) | Slice thickness (mm) | NSA | Echo factor | TI (ms) | b-values (s/mm <sup>2</sup> ) |
|----------------------------------------------|------------|------------------------------------------------------|---------------------------|----------------------|-----|-------------|---------|-------------------------------|
| ADC mapping for blood clot samples (DWI TSE) | 5000/73    | 1.5 x 1.5                                            | 384 x 384                 | 3                    | 6   | 65 (TSE)    | N/A     | 0, 500, 1000                  |

32 TR/TE = repetition time/echo time; NSA = number of signal averages; TI = inversion  
 33 time; TSE = turbo spin echo; ADC = apparent diffusion coefficient; DWI = diffusion-  
 34 weighted imaging.

35

36 **Results: blood clot samples**

37 Table S2 displays bubble-monitoring and post-insonation image parameter  
 38 values measured within liquefaction zones for clot samples. Histotripsy-induced clot  
 39 liquefaction significantly increased  $T_1$ ,  $T_2$ , and ADC by  $302 \pm 122$  ms,  $35 \pm 8$  ms, and  
 40  $0.48 \pm 0.11$  mm<sup>2</sup>/ms, respectively, compared with untreated clot areas. The maximal  
 41 increases in  $T_2$  coincided with clot/agarose interfaces, likely due to magnetic  
 42 susceptibility effects (Figure S1). Regions of clot liquefaction exhibited uniform increases  
 43 in  $T_1$  and ADC relative to areas of untreated clot. The strongest acoustic emissions in  
 44 clot samples were in the center of the liquefaction zone, with weaker emissions on either  
 45 side of this location. Previous studies have demonstrated a threshold acoustic emission  
 46 power required for liquefaction that may be considerably lower than the peak emissions  
 47 observed (Bader *et al* 2018). It is therefore not surprising that liquefaction was observed

48 throughout most of the azimuthal extent of the clot despite a large variation in acoustic  
49 emission power along this dimension (Figure S1).

50

51 **Table S2:** Diagnostic ultrasound and MR parameter values measured within liquefaction  
52 zones for clot samples insonated at 18 MPa.

**Bubble activity monitoring**

|                                                                  |                   |
|------------------------------------------------------------------|-------------------|
| <i>PCI Acoustic Power (<math>\times 10^5 \text{ V}^2</math>)</i> | $2.01 \pm 0.46^*$ |
| <i>Plane Wave Grayscale (<math>\times 10^8</math>)</i>           | $5.25 \pm 1.06^*$ |

**Post-hoc evaluation**

|                                                                                 |                   |
|---------------------------------------------------------------------------------|-------------------|
| <i>Post-hoc <b>conventional</b> B-mode Grayscale (<math>\times 10^8</math>)</i> | $30.6 \pm 15.9^*$ |
| <i><math>T_1</math> (ms)</i>                                                    | $1240 \pm 152^*$  |
| <i><math>T_2</math> (ms)</i>                                                    | $107 \pm 20^*$    |
| <i>ADC (<math>\text{mm}^2/\text{ms}</math>)</i>                                 | $1.13 \pm 0.08^*$ |

53

54 \* Liquefaction zone significantly different from background (untreated) clot.

55 All errors are given as standard deviations.

56

57

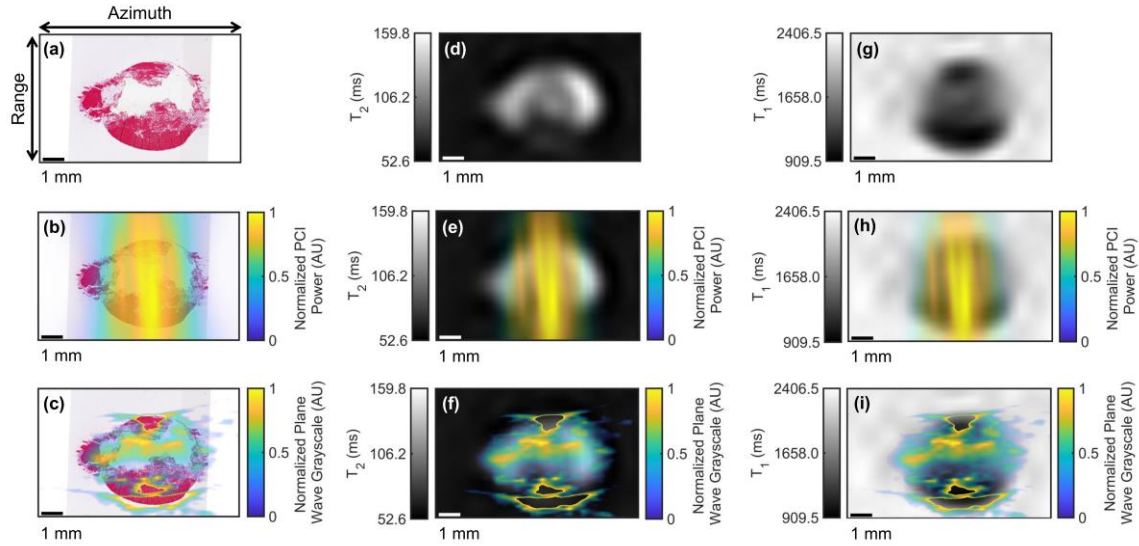

58

59 **Figure S1: Registration of imaging with histologic observation of blood clot sample**  
60 **liquefaction.** (a) Hematoxylin and eosin (H&E) stain of blood clot sample exposed to  
61 histotripsy, (b) coregistration of passive cavitation imaging (PCI) acoustic power and  
62 H&E-stained clot sample, (c) coregistration of plane wave grayscale and H&E-stained  
63 clot sample, (d) parametric  $T_2$  map of treated clot sample, (e) coregistration of PCI  
64 acoustic power and  $T_2$  map, (f) coregistration of plane wave grayscale and  $T_2$  map, (g)  
65 parametric  $T_1$  map of treated clot sample, (h) coregistration of PCI acoustic power and  
66  $T_1$  map, and (i) coregistration of plane wave grayscale and  $T_1$  map. The histotripsy pulse  
67 (1-MHz fundamental frequency, 5- $\mu$ s pulse duration, 18-MPa peak negative pressure)  
68 propagated from left to right in the image. The azimuth/range dimensions of the  
69 diagnostic ultrasound imaging plane are indicated in the panel (a). The most  
70 hyperechoic pixels in the plane wave images, corresponding to reflections from the top  
71 and bottom of the clot, have been removed for better windowing and visualization of the  
72 histotripsy bubble cloud.  
73

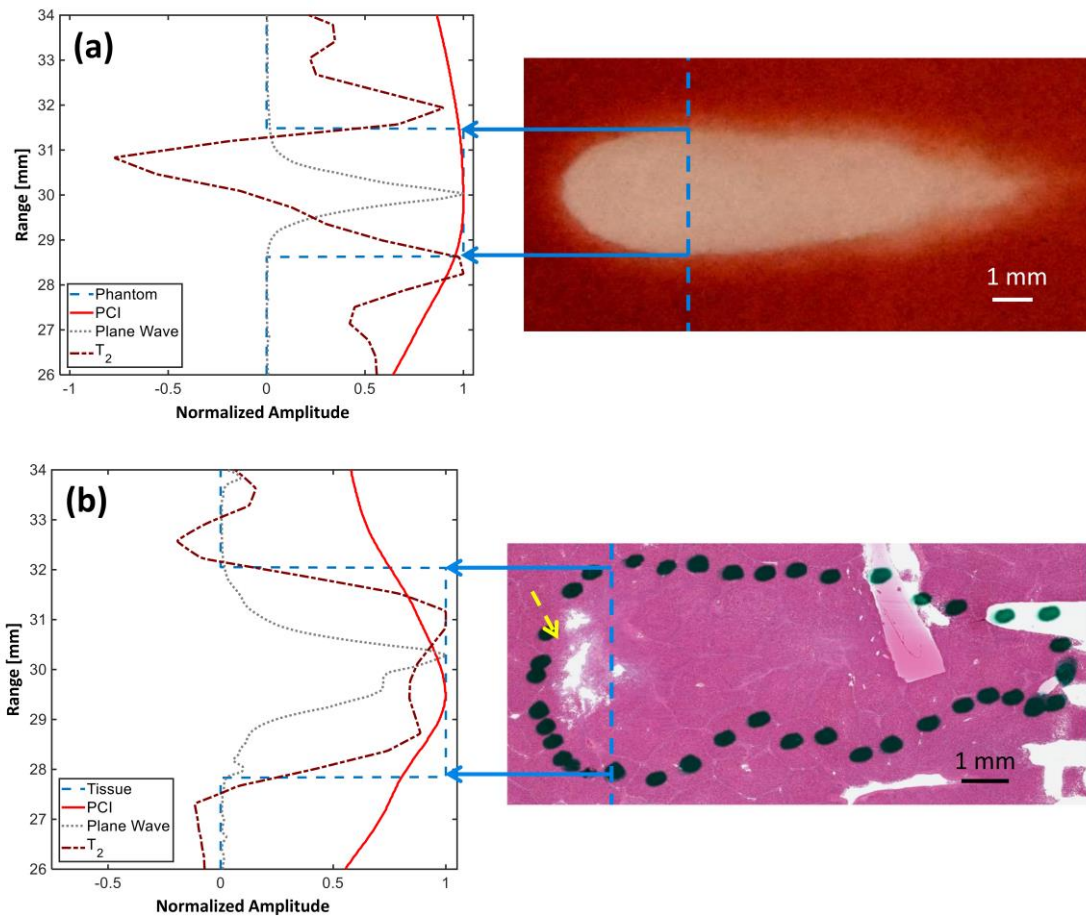

75  
76  
77  
78  
79  
80  
81  
82  
83  
84  
85  
86  
87

**Figure S2:** Normalized amplitudes of passive cavitation imaging (PCI) acoustic power, plane wave grayscale, and change in  $T_2$  from background at the azimuth position of maximum PCI power (vertical dashed blue lines in right-side images) for (a) a red blood cell phantom, and (b) a liver sample. Apparent diffusion coefficient signals in red blood cell phantoms and  $T_1$  and plane wave grayscale signals in all samples were dominated by noise and thus excluded from this figure. The locations of liquefaction are binarized for the plots, with values of 1 indicating liquefaction and 0 indicating intact media. The azimuthal location of maximum PCI power in the liver sample corresponds with more thorough liquefaction as indicated by hematoxylin and eosin staining (yellow dashed arrow). The histotripsy pulse (1-MHz fundamental frequency, 5- $\mu$ s pulse duration, 17-MPa peak negative pressure for RBC phantom, 25-MPa peak negative pressure for liver sample) propagated from left to right in each image.

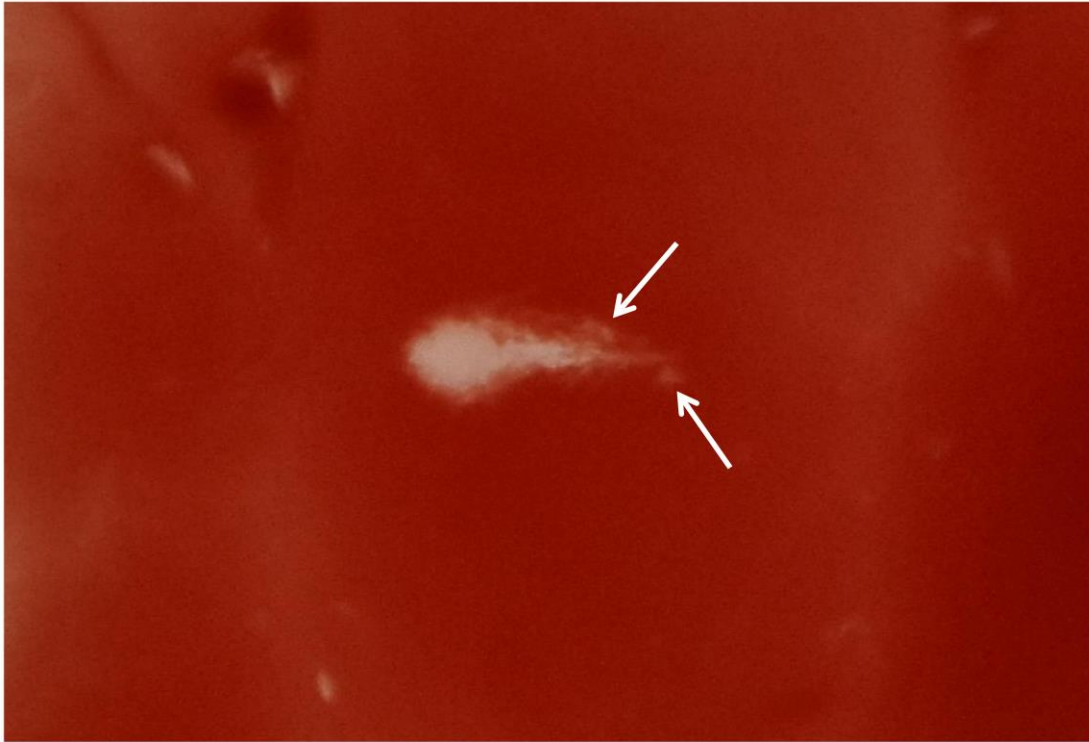

88

89 **Figure S3:** Gross digital photograph of liquefaction zone in a red blood cell phantom.  
90 The histotripsy pulse (1-MHz fundamental frequency, 5- $\mu$ s pulse duration, 13-MPa peak  
91 negative pressure) propagated from left to right in the image. Discontinuous liquefaction  
92 regions along the periphery of the focal zone (white arrows) may indicate sites of  
93 persistent bubble clouds.
